# Supplementary material for: The complex aerodynamic footprint of desert locusts revealed by large-volume tomographic particle image velocimetry
Source: PubMed Central journal article supplement (PMC4528577; doi:10.1098/rsif.2015.0119), 2015-07-06
Supplement: rsif20150119supp3.pdf [file rsif20150119supp3.pdf]

Supplementary figure 3

**a**

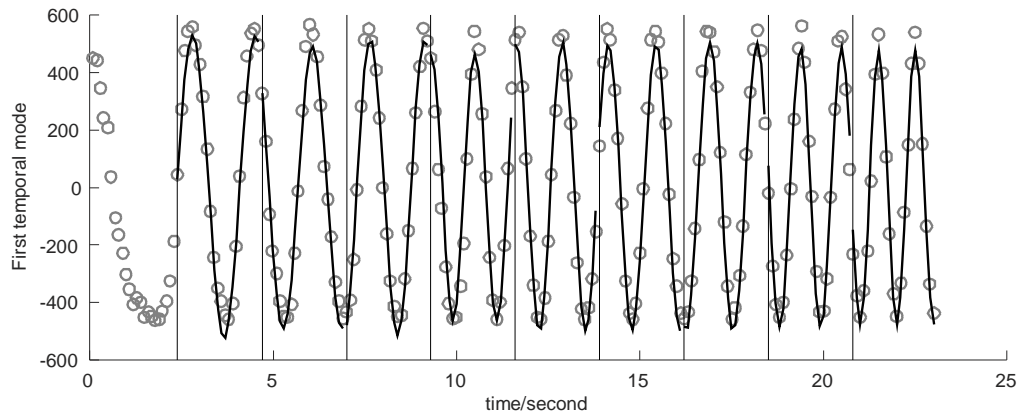

**b**

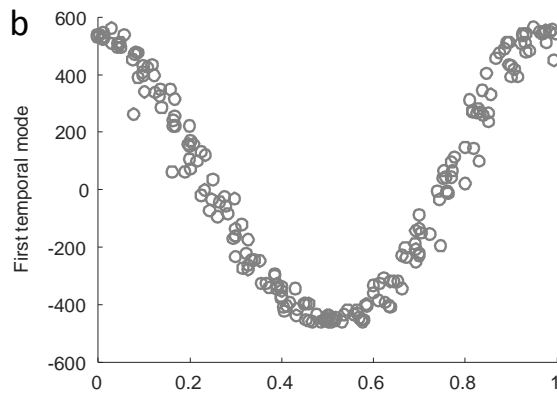

**c**

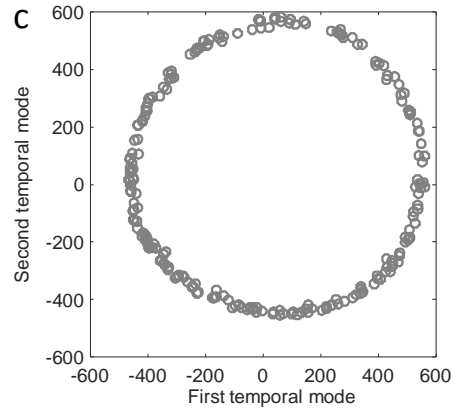

Reconstruction of phase-averaged wingbeat with fitted sinusoidal curves. a) The first temporal mode (circles) and sinusoidal curves fitted by Levenberg-Marquardt algorithm in each window. The first window in this sequence is neglected due to phase-lock. b) The temporal modes arranged by the phase derived by fitted curves. c) First and second temporal modes.
