# Supplementary material for: The complex aerodynamic footprint of desert locusts revealed by large-volume tomographic particle image velocimetry
Source: PubMed Central journal article supplement (PMC4528577; doi:10.1098/rsif.2015.0119), 2015-07-06
Supplement: rsif20150119supp4.pdf [file rsif20150119supp4.pdf]

Supplementary figure 4

(Instantaneous representation of the full wingbeat wave length)

Instantaneous representation of the full wingbeat wave length. Wake elements colour coded by origin; green: forewing upstroke tip vortex, cyan: forewing starting vortex and early tip vortex, dark blue: forewing downstroke tip vortex, orange: hindwing downstroke starting vortex, yellow: hindwing downstroke root vortex, red: hindwing downstroke tip vortex. To maintain a reasonable file size, the unlabelled (grey) features have been downsampled to 20 % of the original facets.
